# Supplementary material
Source: PubMed Central journal article supplement (PMC1887591)
Supplement: pnas_0703166104_3.pdf [file pnas_0703166104_3.pdf]

## SI Text

If we assume that capsid has a shape of an oblate upon deformation (see Fig. 6 *a* and *b*), it is rather simple to show that following relations are valid for the volume and area of an oblate under the deformation with the force  $F$  along the short axis of the capsid from  $2r_0$  to  $2r_0 - D$   $r_{\text{short}} = 2r_0 - D$ :

$$\frac{V}{V_0} = x_{\text{short}} \cdot x_{\text{long}}^2 \quad [7]$$

$$\frac{A}{A_0} = 0.5 \cdot x_{\text{long}}^2 + 0.5 \cdot \frac{x_{\text{long}} \cdot x_{\text{short}}^2}{\sqrt{x_{\text{long}}^2 - x_{\text{short}}^2}} \cdot \ln \left( \frac{x_{\text{long}}}{x_{\text{short}}} + \sqrt{\left( \frac{x_{\text{long}}}{x_{\text{short}}} \right)^2 - 1} \right) \quad [8]$$

where  $V_0$  and  $A_0$  are volume and area of the spherical capsid before the deformation:

$$V_0 = \frac{4\pi}{3} \cdot r_0^3 \quad \text{and} \quad A_0 = 4\pi \cdot r_0^2 \quad [9]$$

If we make an approximation that the area of the oblate is constant under deformation, then Eq. 8 can be used to describe how  $x_{\text{long}}$  varies as a function of  $x_{\text{short}}$  under capsid deformation. Fig. 7 shows this variation.

As a good approximation for relation between  $x_{\text{long}}$  and  $x_{\text{short}}$  for an oblate with constant mantle surface, for  $x_{\text{short}} > 0.4$  the following relation can be used:

$$x_{\text{long}} \approx 1.5 - 0.5 \cdot x_{\text{short}} \quad [10]$$

By combining this relation with Eq. 7, one can construct the following relation between  $V$  and  $x_{\text{short}}$  for an oblate with a constant mantle surface:

$$V = \frac{4\pi}{3} \cdot r_0^3 \cdot x_{\text{short}} \cdot x_{\text{long}}^2 \approx \frac{\pi}{3} \cdot r_0^3 \cdot x_{\text{short}} \cdot (3 - x_{\text{short}})^2 = \frac{\pi}{3} \cdot r_0^3 \cdot \left(1 - \frac{D}{2r_0}\right) \cdot \left(2 + \frac{D}{2r_0}\right)^2 \quad [11]$$

Now, taking the derivative of Eq. 9 with regard to the length of deformation  $D$ , we will obtain the following equation for the derivative  $dV/dD$ :

$$\frac{dV}{dD} \approx -\frac{\pi \cdot r_0 \cdot D}{2} - \frac{\pi \cdot D^2}{8} \quad [12]$$

which implies that the contribution to the resisting force  $F(D)$  from the osmotic pressure of DNA in the viral capsid can be described by:

$$F_{\text{osmotic}}(D) \approx \Pi_{\text{osmotic}}(c_0 \cdot V_0 / V) \cdot \frac{\pi \cdot r_0}{2} \cdot D \quad [13]$$

where  $c_0$  is DNA concentration in the undeformed capsid.

Similar relation is obtained also if we assume that the spherical capsid is deformed to a truncated sphere with a constant area, see Fig. 6c. One can show that for a truncated sphere, the following relations are describing capsid's volume and area:

$$\frac{V}{V_0} = x_{\text{short}} \cdot (1.5 \cdot x_{\text{long}}^2 - 0.5 \cdot x_{\text{short}}^2) \quad [14]$$

$$\frac{A}{A_0} = \frac{A_{\text{mantle}} + 2A_{\text{plane}}}{A_0} = x_{\text{long}} \cdot x_{\text{short}} + 0.5 \cdot (x_{\text{long}}^2 - x_{\text{short}}^2) \quad [15]$$

By combing Eqs. **14** and **15** the following relation between  $V$ ,  $A$  and  $x_{\text{short}}$  can be constructed:

$$\frac{V}{V_0} = 3x_{\text{short}} \cdot \frac{A}{A_0} + 4 \cdot x_{\text{short}}^3 - 3 \cdot x_{\text{short}}^2 \cdot \sqrt{2x_{\text{short}}^2 + 2A/A_0} \quad [16]$$

By taking the derivative of Eq. **16** with regard to the length of deformation  $D$ , we will obtain the following relation for the derivative  $dV/dD$  if area is constant:

$$\begin{aligned} \frac{dV}{dD} &= -\frac{2\pi \cdot r_0^2}{3} \cdot \left( 3 + 12 \cdot x_{\text{short}}^2 - 6 \cdot x_{\text{short}} \cdot \sqrt{2x_{\text{short}}^2 + 2} - \frac{6 \cdot x_{\text{short}}^3}{\sqrt{2x_{\text{short}}^2 + 2}} \right) \approx \\ &\approx -\frac{\pi \cdot r_0}{2} \cdot D + \frac{\pi}{16} \cdot D^2 + \dots \end{aligned} \quad [17]$$

The same result as in Eq. **13** is obtained for the DNA osmotic pressure contribution to the force of capsid deformation  $F(D)$ .

**Figure Captions:**

Fig. 6 (a) *An undeformed spherical capsid with radius  $r_0$ ; b) deformed oblate capsid and c) truncated spherical capsid with the length of short axis =  $2r_0 x_{\text{short}}$  and the length of long axis =  $2r_0 x_{\text{long}}$  (where  $x$  is the scaling prefactor).*

Fig. 7. *The relative length of the oblates long axis,  $x_{\text{long}}$ , as a function of the relative length of the short axis,  $x_{\text{short}}$ , for oblates with the same area of the mantle surface (solid line). Dashed line illustrates an almost linear relation.*
