# Supplementary material
Source: PubMed Central journal article supplement (PMC1887591)

**a**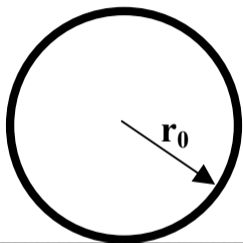**b**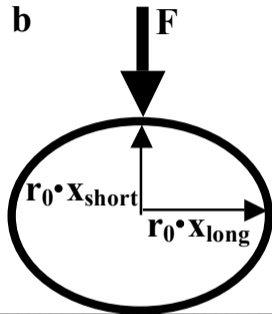**c**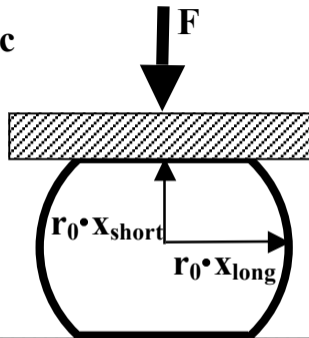

Supplement: pnas_0703166104_1.pdf [file pnas_0703166104_1.pdf]

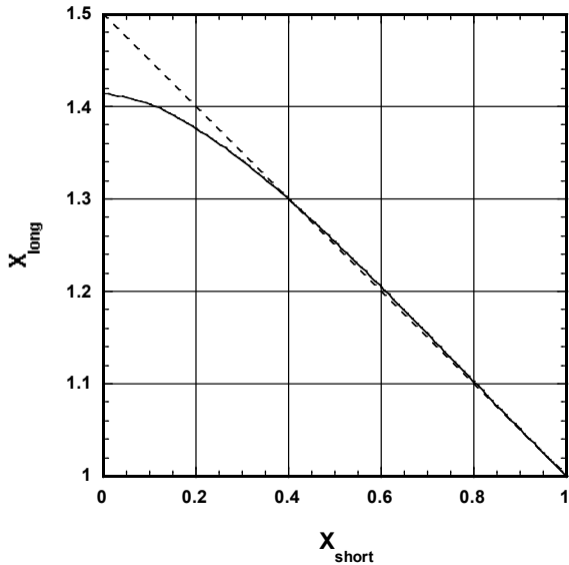

Supplement: pnas_0703166104_2.pdf [file pnas_0703166104_2.pdf]
